# Supplementary material for: Evaluating chronic kidney disease in rural South Africa: comparing estimated glomerular filtration rate using point-of-care creatinine to iohexol measured GFR
Source: publisher site journal article supplement (doi:10.1515/cclm-2020-1882), 2021-03-13
Supplement: Supplementary file 1 [file j_cclm-2020-1882_suppl_002.docx]

**Supplementary Material** [**https://doi.org/10.1515/cclm-2020-1882**](https://doi.org/10.1515/cclm-2020-1882)

Legends to Figurs and Tables

Figure S1: MDRD eGFR (with African-American coefficient) vs iohexol mGFR.

Figure S2: CKD-EPI eGFR (with African-American coefficient) vs iohexol mGFR.

Figure S3: Revised Lund-Malmö eGFR vs iohexol mGFR.

Table S1: Accuracy within 30% of mGFR (P30) according to CKD stage, including revised Lund-Malmö equation.

Table S2: Samples correctly classified according to KDIGO GFR staging.
